# Supplementary material
Source: Springer Nature journal article supplement (https://www.springermedizin.de/resource/supplementary/13075_2013_4445_MOESM3_ESM.pdf/10110424)

PGE2 pg/ml

50  
40  
30  
20  
10  
0

control

cond media

Indomethacin

A83-01

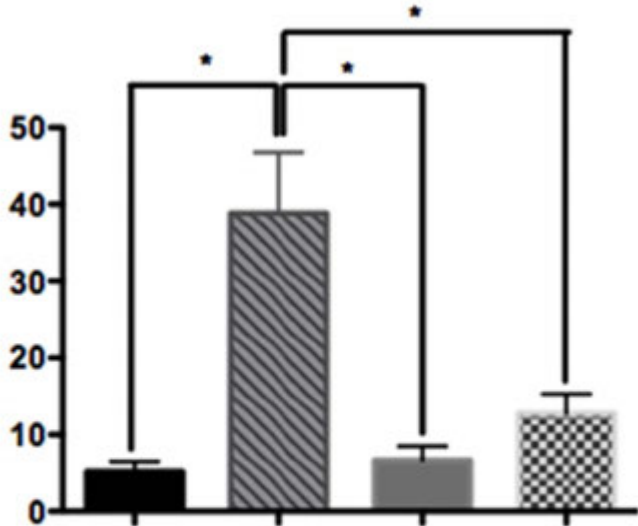

Supplement: MOESM3 [file 10110424]
